# Supplementary material for: A tetravalent live attenuated dengue virus vaccine stimulates balanced immunity to multiple serotypes in humans
Source: PubMed Central journal article supplement (PMC7889627; doi:10.1038/s41467-021-21384-0), 2021-02-17
Supplement: 41467_2021_21384_MOESM1_ESM.pdf [file 41467_2021_21384_MOESM1_ESM.pdf]

## Supplementary Figure 1

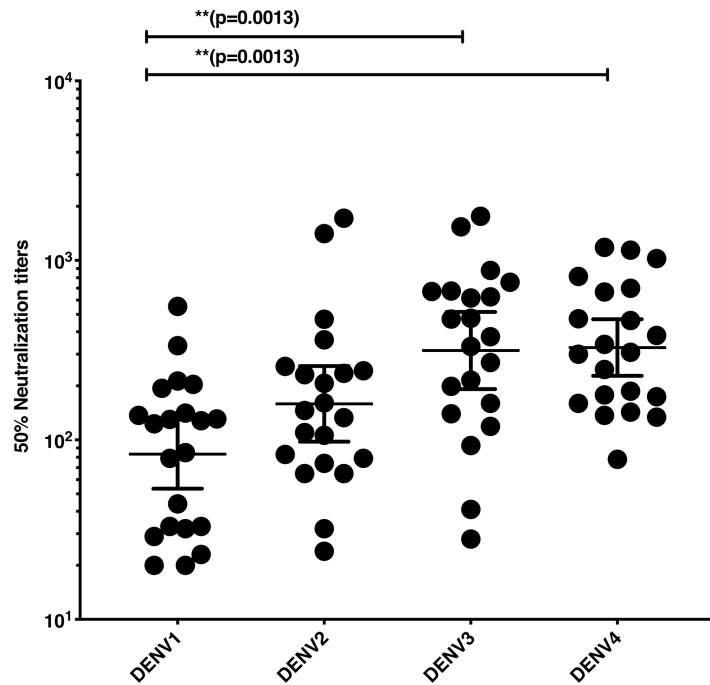

**Supplementary Figure 1. Neutralizing antibody levels in TV003 recipients who were DENV naïve before vaccination.** Neutralizing antibodies were measured in samples collected from 21(n=21) subjects 6 months after single dose of vaccination with TV003. Each data point represents the mean Neut<sub>50</sub> titer per individual for each serotype. Data were analyzed from a total number of 21 subjects indicated as dots from a single independent experiment and expressed as geometric mean titers  $\pm$  95% confidence intervals of the grouped samples. Nonparametric One-way Anova with Friedman Dunn's multiple comparisons test was used. Each p value was adjusted to account for multiple comparisons. (\*\*\*\* $p < 0.0001$ ; \*\*\* $p < 0.001$ ; \*\* $p < 0.01$ ; \* $p < 0.05$ ). The serotypes with significantly high geometric mean titers compared to other serotypes is shown (DENV3: \*\* $p = 0.0013$ ; CI:288.2-707; DENV4: \*\* $p = 0.0013$ ; CI: 281.4-598.1).

## Supplementary Figure 2

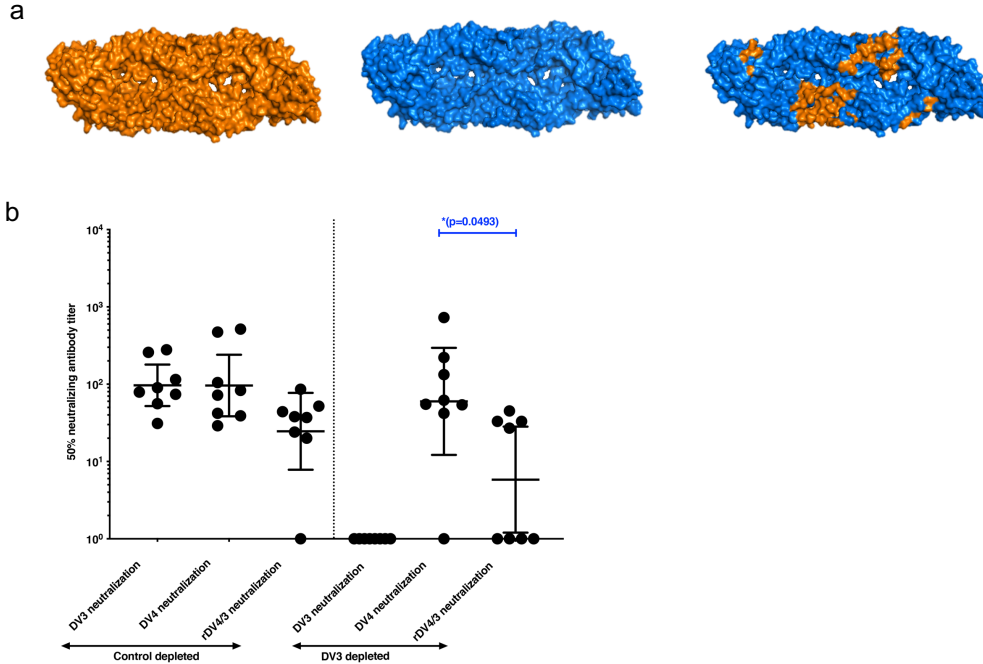

**Supplementary Figure 2: TV003 induce varying levels of DENV4 serotype specific responses against known DENV4 neutralizing epitopes.** **a** DENV3 wt (orange), DENV4 wt (blue) rDENV4/3 with DENV3 specific 5J7 mAb epitope transplanted into DENV4 (shown in orange) are depicted. It is the same region where the epitopes of DENV4-126, 131 nAb epitopes reside on DENV4. **b** Panel of 8 (n=8) TV003 sera with evidence of DENV4 TS responses were subjected to depletions against DENV3 to map the DENV4 TS nAb epitopes using the rDENV4/3 virus. This is a loss of function virus. Figure shows the Neut<sub>50</sub> titers for the BSA depleted and the DENV3 depleted serum samples against DENV3 wt, DENV4 wt and the rDENV4/3 viruses. Data were analyzed from a total number of 8 subjects indicated as dots from a single independent experiment and expressed as geometric mean titers  $\pm$  95% confidence intervals. Nonparametric One-way Anova with Friedman Dunn's multiple comparisons test (**b**) was used for the epitope mapping data to determine the loss or gain in neutralization to the recombinant chimeric viruses compared to the wild type parental backbone viruses. Each p value was adjusted to account for multiple comparisons. (\*\*\*\* $p < 0.0001$ ; \*\*\* $p < 0.001$ ; \*\* $p < 0.01$ ; \* $p < 0.05$ ). The significant loss in neutralization of DENV4 TS nAbs against rDENV4/3 is indicated (\* $p = 0.0493$ ; CI:2.2–33.2) (**b**).

### Supplementary Figure 3

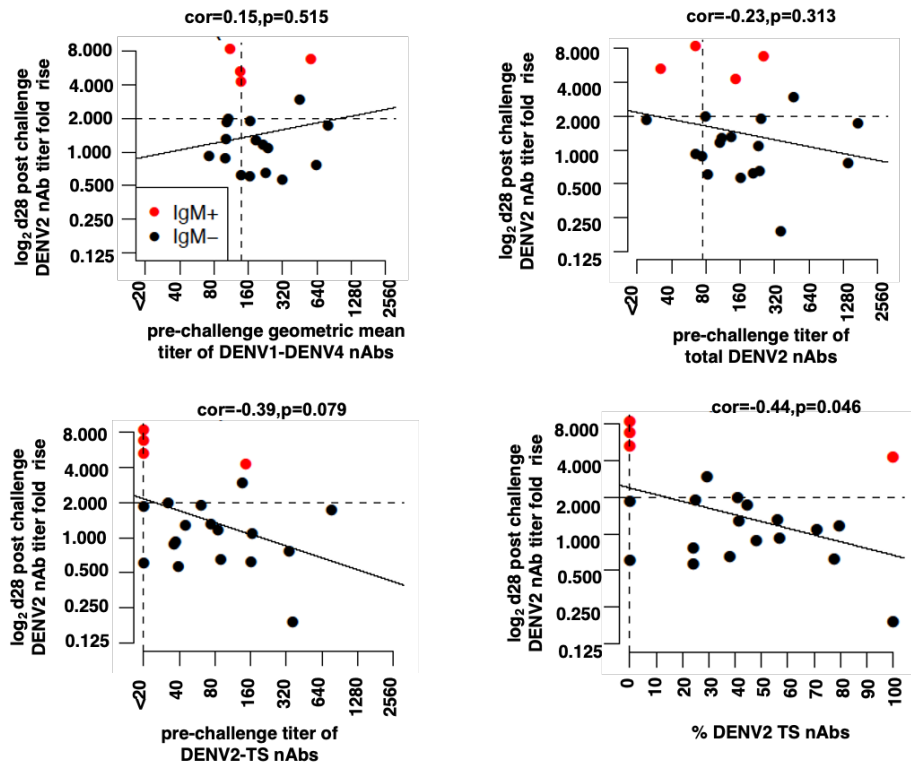

**Supplementary Figure 3: Immune correlate analysis of DENV2 Ab level vs specificity.** Figure shows the relationship of various predictors (total DENV2 nAb titer, absolute TS DENV2 nAb titer, DENV2 %TS responses, geometric mean nAb titers against DENV1-DENV4) in all the vaccine recipients (n=21) against DENV2 specific day 28 post challenge boost data. Points are colored by IgM positivity measured at day 28. Black solid line shows linear relationship between predictor and outcome variables. "Cor" indicates the Pearson's product-moment correlation and p-value. Odds ratio with 95% confidence intervals are shown for risk of  $\geq 2$ -fold boost (equal to or above the horizontal dotted line) for those with predictor values greater than or equal to the titer threshold (indicated by vertical dotted line). Odds ratio confidence intervals that do not include 1 are significant. Data were analyzed by an exploratory statistical analysis to evaluate the relationship between pre-challenge nAb titer and boost in DENV2 nAb titer post-challenge. The correlation between predictor and outcome variables were evaluated by using Pearson's product-moment correlation. The odds ratio analysis of  $\geq 2$ -fold boost in DENV2 nAb titer for those with predictor nAb levels above vs. at or below a specified threshold were estimated using the mosaic package in R.

**Supplementary Table 1. DENV neutralizing antibody levels in subjects who received TV003 vaccine or placebo**

|               | Subject | Reciprocal of Neut <sub>50</sub> titers against DENV1-4 |       |       |       |
|---------------|---------|---------------------------------------------------------|-------|-------|-------|
|               |         | DENV1                                                   | DENV2 | DENV3 | DENV4 |
| TV003 vaccine | 1       | 141                                                     | 207   | 93    | 134   |
|               | 2       | 123                                                     | 235   | 270   | 341   |
|               | 3       | 29                                                      | 146   | 618   | 137   |
|               | 4       | 23                                                      | 65    | 332   | 300   |
|               | 5       | 44                                                      | 79    | 199   | 187   |
|               | 6       | 213                                                     | 106   | 672   | 143   |
|               | 7       | 32                                                      | 133   | 140   | 178   |
|               | 8       | 85                                                      | 74    | 215   | 78    |
|               | 9       | 137                                                     | 231   | 627   | 160   |
|               | 10      | 33                                                      | 24    | 376   | 382   |
|               | 11      | 555                                                     | 32    | 41    | 473   |
|               | 12      | <20                                                     | 65    | 476   | 174   |
|               | 13      | 79                                                      | 243   | 160   | 247   |
|               | 14      | 130                                                     | 1411  | 756   | 1142  |
|               | 15      | 33                                                      | 83    | 880   | 308   |
|               | 16      | 128                                                     | 470   | 675   | 1024  |
|               | 17      | 204                                                     | 161   | 471   | 667   |
|               | 18      | <20                                                     | 361   | 28    | 814   |
|               | 19      | 194                                                     | 257   | 1761  | 1183  |
|               | 20      | 335                                                     | 1720  | 1541  | 463   |
|               | 21      | 131                                                     | 110   | 119   | 700   |
| Placebo       | 22      | <20                                                     | <20   | <20   | <20   |
|               | 23      | <20                                                     | <20   | <20   | <20   |
|               | 24      | <20                                                     | <20   | <20   | <20   |
|               | 25      | <20                                                     | <20   | <20   | <20   |

**Supplementary table 2. Level of serotype specific neutralizing antibody responses**

**in TV003 vaccine recipients**

|               | Subject | Absolute serotype specific nAb titer >20 (% type-specific neutralizing nAbs against DENV1-4) |          |           |           |
|---------------|---------|----------------------------------------------------------------------------------------------|----------|-----------|-----------|
|               |         | DENV1                                                                                        | DENV2    | DENV3     | DENV4     |
| TV003 vaccine | 1       | 141(100)                                                                                     | 161(78)  | 93(100)   | 134(100)  |
|               | 2       | 74(60)                                                                                       | 89(38)   | 184(68)   | 65(19)    |
|               | 3       | 0                                                                                            | 146(100) | 618(100)  | 103(75)   |
|               | 4       | 0                                                                                            | 0        | 139(42)   | 300(100)  |
|               | 5       | 0                                                                                            | 32(41)   | 165(83)   | 187(100)  |
|               | 6       | 170(80)                                                                                      | 85(80)   | 571(85)   | 89(62)    |
|               | 7       | 0                                                                                            | 74(56)   | 95(68)    | 142(80)   |
|               | 8       | 57(70)                                                                                       | 36(48)   | 142(66)   | 74(95)    |
|               | 9       | 101(74)                                                                                      | 164(71)  | 445(71)   | 146(91)   |
|               | 10      | 0                                                                                            | 0        | 323(86)   | 309(81)   |
|               | 11      | 555(100)                                                                                     | 0        | 0         | 407(86)   |
|               | 12      | 0                                                                                            | 37(57)   | 476(100)  | 129(74)   |
|               | 13      | 44(56)                                                                                       | 61(25)   | 83(52)    | 106(43)   |
|               | 14      | 0                                                                                            | 339(24)  | 76(10)    | 1085(95)  |
|               | 15      | 0                                                                                            | 0        | 0         | 308(100)  |
|               | 16      | 22(17)                                                                                       | 136(29)  | 675(100)  | 584(57)   |
|               | 17      | 92(45)                                                                                       | 39(24)   | 188(40)   | 213(32)   |
|               | 18      | 0                                                                                            | 361(100) | 0         | 814(100)  |
|               | 19      | 194(100)                                                                                     | 0        | 722(41)   | 1183(100) |
|               | 20      | 235(70)                                                                                      | 774(45)  | 1541(100) | 139(30)   |
|               | 21      | 88(67)                                                                                       | 45(41)   | 75(63)    | 231(33)   |
| Placebo       | 22      | 0                                                                                            | 0        | 0         | 0         |
|               | 23      | 0                                                                                            | 0        | 0         | 0         |
|               | 24      | 0                                                                                            | 0        | 0         | 0         |
|               | 25      | 0                                                                                            | 0        | 0         | 0         |

**Supplementary table 3. rDENVs used for epitope mapping studies**

| Epitope mapping | rDENV    | Backbone serotype | Test serotype | Serotypes other than backbone and test serotypes |
|-----------------|----------|-------------------|---------------|--------------------------------------------------|
| DENV1           | rDENV2/1 | DENV2             | DENV1         | DENV3,4                                          |
| DENV2           | rDENV4/2 | DENV4             | DENV2         | DENV1,3                                          |
| DENV3, DENV4    | rDENV4/3 | DENV4             | DENV3         | DENV1,2                                          |
| DENV4           | rDENV2/4 | DENV2             | DENV4         | DENV1,3                                          |

**Supplementary table 4. DENV2 neutralizing antibody boost and IgM data**

| Subject | 6 months post vaccination<br>DENV2 nAb titer | Day 28 DENV2 nAb<br>titer post challenge | Fold rise in nAb<br>against DENV2 | DENV2<br>% TS | IgM increase<br>post<br>challenge<br>(Y/N) |
|---------|----------------------------------------------|------------------------------------------|-----------------------------------|---------------|--------------------------------------------|
| 1       | 116                                          | 72                                       | 0.62                              | 78            | N                                          |
| 2       | 361                                          | 234                                      | 0.65                              | 38            | N                                          |
| 3       | <b>263</b>                                   | <b>1133</b>                              | <b>4.31</b>                       | <b>100</b>    | <b>Y</b>                                   |
| 4       | <b>303</b>                                   | <b>2550</b>                              | <b>8.42</b>                       | <b>0</b>      | <b>Y</b>                                   |
| 5       | 121                                          | 241                                      | 1.99                              | 41            | N                                          |
| 6       | 506                                          | 588                                      | 1.16                              | 80            | N                                          |
| 7       | 641                                          | 833                                      | 1.3                               | 56            | N                                          |
| 8       | 709                                          | 624                                      | 0.88                              | 48            | N                                          |
| 9       | 261                                          | 285                                      | 1.09                              | 71            | N                                          |
| 10      | 74                                           | 137                                      | 1.85                              | 0             | N                                          |
| 11      | <b>83</b>                                    | <b>444</b>                               | <b>5.35</b>                       | <b>0</b>      | <b>Y</b>                                   |
| 12      | 60                                           | 56                                       | 0.93                              | 57            | N                                          |
| 13      | 299                                          | 566                                      | 1.89                              | 25            | N                                          |
| 14      | 1102                                         | 850                                      | 0.77                              | 24            | N                                          |
| 15      | 334                                          | 205                                      | 0.61                              | 0             | N                                          |
| 16      | <b>315</b>                                   | <b>931</b>                               | <b>2.96</b>                       | <b>29</b>     | <b>N</b>                                   |
| 17      | 106                                          | 59                                       | 0.56                              | 24            | N                                          |
| 18      | 26                                           | 5                                        | 0.19                              | 100           | N                                          |
| 19      | <b>430</b>                                   | <b>2944</b>                              | <b>6.85</b>                       | <b>0</b>      | <b>Y</b>                                   |
| 20      | 1413                                         | 2462                                     | 1.74                              | 45            | N                                          |
| 21      | 154                                          | 196                                      | 1.27                              | 41            | N                                          |

**Bold indicates the individuals who showed a boost greater than 2-fold**

**Supplementary table 5: Comparison of the two depletion strategies (DENV1 and DENV234mix vs DENV2 and DENV134mix) in subjects in 6 and 19**

| Subject | Depletion Strategy    | Absolute serotype specific nAb titer >20 (% type-specific neutralizing nAbs against DENV1-4) |         |          |           |
|---------|-----------------------|----------------------------------------------------------------------------------------------|---------|----------|-----------|
|         |                       | DENV1                                                                                        | DENV2   | DENV3    | DENV4     |
| 6       | DENV2 and DENV134 mix | 170(80)                                                                                      | 85(80)  | 571(85)  | 89(62)    |
|         | DENV1 and DENV234 mix | 95(57)                                                                                       | 157(69) | 811(100) | 168(61)   |
| 19      | DENV2 and DENV134 mix | 194(100)                                                                                     | 0       | 722(41)  | 1183(100) |
|         | DENV1 and DENV234 mix | 167(88)                                                                                      | 0       | 890(100) | 777(88)   |
